# Supplementary material for: Dual signal amplification for bioassays using ion release from nanolabels and ion-activated enzyme kinetics
Source: Royal Society of Chemistry journal article supplement (doi:10.1039/c2an35717h), 2012-01-01
Supplement: c2an35717h.pdf [file c2an35717h.pdf]

## **Supporting Information**

# Dual Signal Amplification for Bioassays Using Ion Release of Nanolabels and Ion-Activated Enzyme Kinetics

Chad L. Cowles and Xiaoshan Zhu\*

Department of Electrical and Biomedical Engineering

University of Nevada Reno

Reno, Nevada, USA 89557

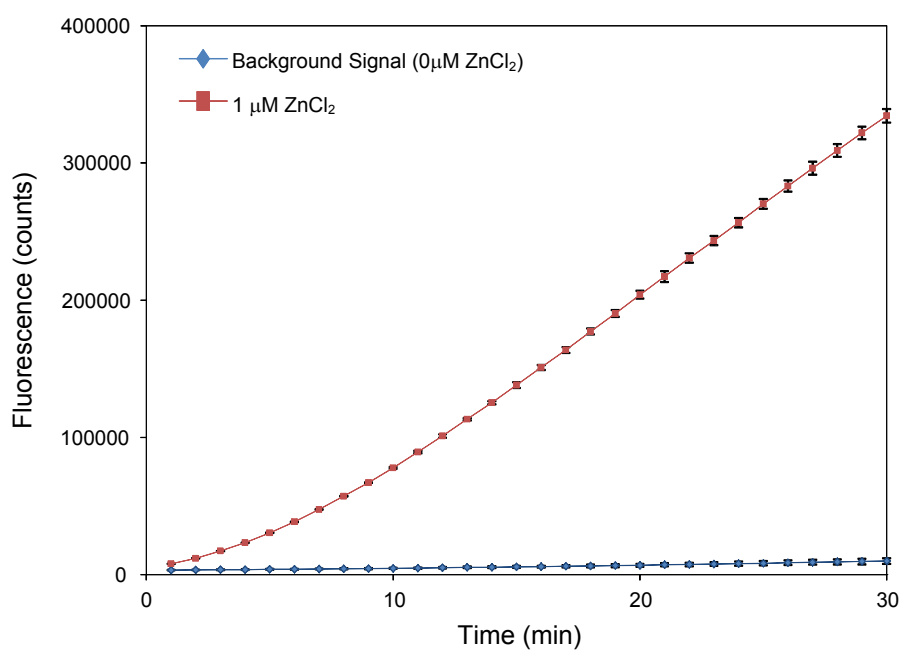

**Figure S1.** The fluorescence response for the enzymatic reaction of 2 μM apo-CA and 10 μM FDA with two different ZnCl<sub>2</sub> concentrations

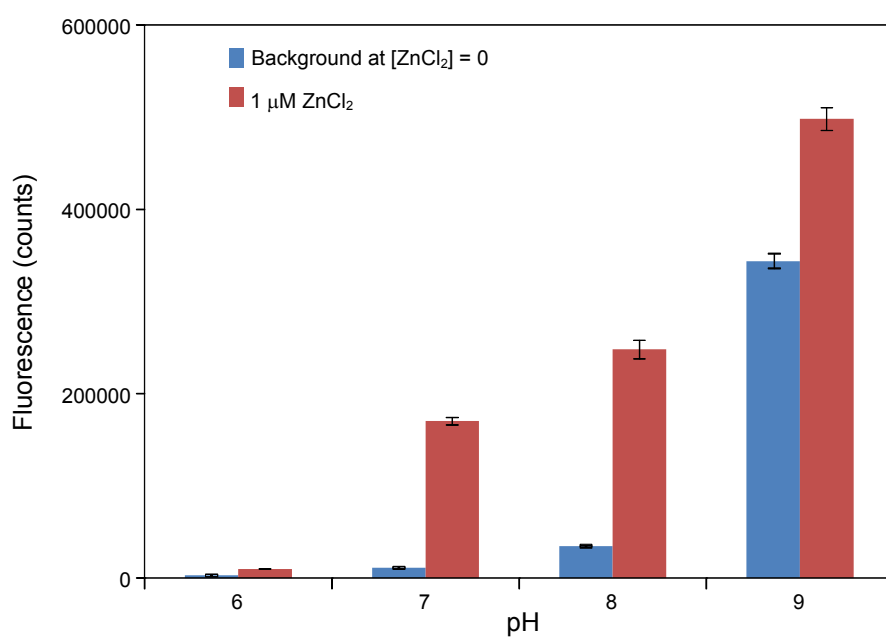

**Figure S2.** Effects of pH on the reaction of apo-CA with ZnCl<sub>2</sub> and FDA (all chemicals are prepared in solutions with the same pH)

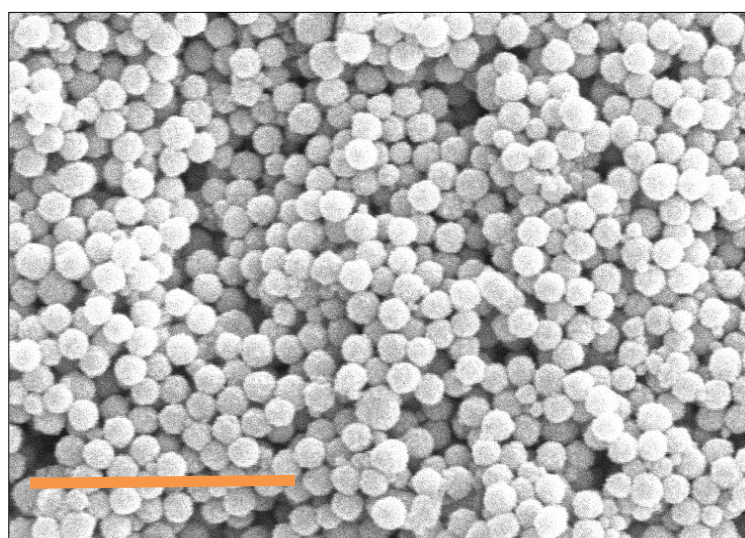

**Figure S3.** SEM image of the prepared ZnS nanoparticles with a ~50 nm diameter (the bar in the image is in 500 nm scale)

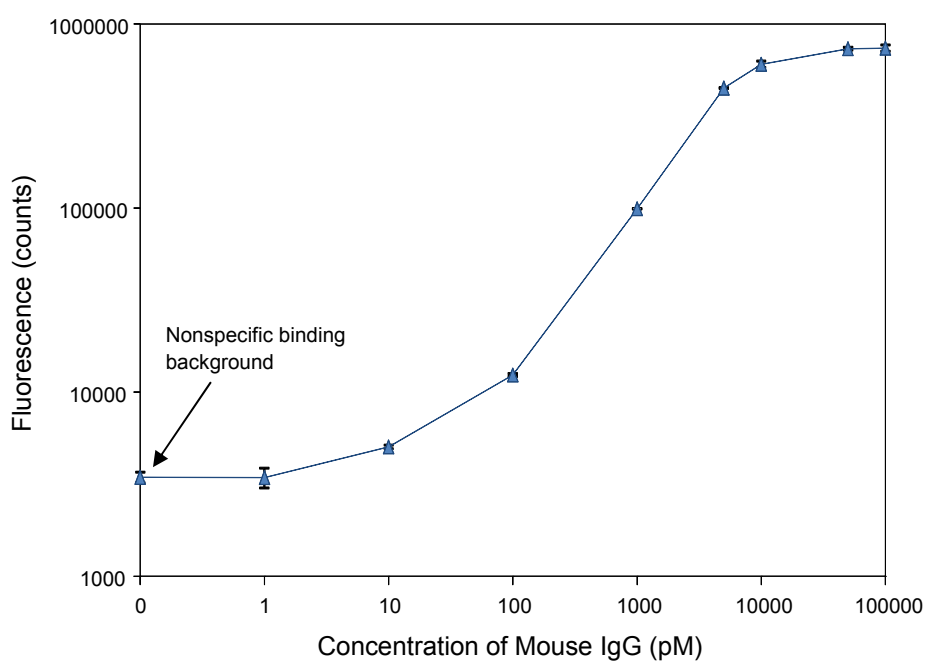

**Figure S4.** The calibration curves of the streptavidin-beta-galactosidase based immunoassay on mouse IgG (the detection limit is around 5 pM on the basis of the three times of standard deviation of the background)

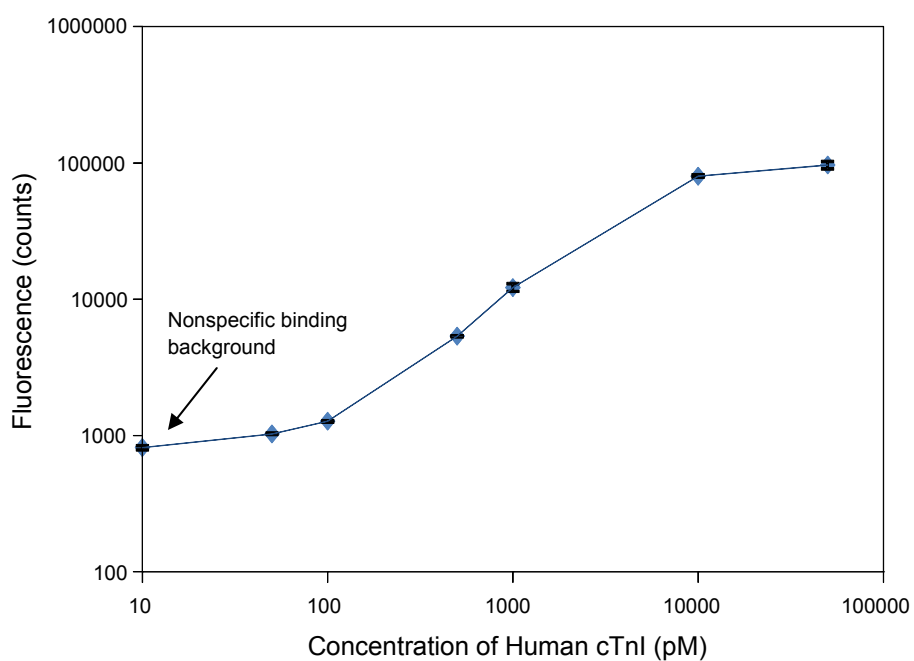

**Figure S5.** The calibration curves of the streptavidin-beta-galactosidase based immunoassay on cTnI (the detection limit is around 50 pM on the basis of the three times of standard deviation of the background)
